# Supplementary material
Source: PubMed Central journal article supplement (PMC3695361)
Supplement: supp_blood-2012-11-467753_blood-2012-11-467753-1.pdf [file supp_blood-2012-11-467753_blood-2012-11-467753-1.pdf]

# **Human iPS Cell-Derived Hematopoietic Progenitor Cells induce T-cell Anergy in Alloreactive CD8<sup>+</sup> T-cells**

Eun-Mi Kim,<sup>1</sup> Gohar Manzar,<sup>1,2</sup> and Nicholas Zavazava<sup>1,2</sup>,

## **Author Affiliations**

<sup>1</sup>Department of Internal Medicine, Division of Immunology, University of Iowa Hospitals and Clinics & Iowa City Veterans Affairs Medical Center, Iowa City, IA, 52242, USA

<sup>2</sup>Department of Biomedical Engineering, University of Iowa, Iowa City, IA, 52242, USA

## **Supplementary Methods**

### **Differentiation of human iPS cells into HPCs**

Human iPS cells were differentiated into CD34<sup>+</sup> HPCs as was previously described <sup>27</sup>.

In brief, undifferentiated iPS cells were plated onto overgrown OP9 cells and cultured for 7 to 12 days in  $\alpha$ -MEM medium supplemented with 10% FBS (Hyclone), 100U/ml penicillin, 100 $\mu$ g/ml streptomycin, 100 $\mu$ M MTG (Sigma), and 50 $\mu$ g/ml ascorbic acid (Sigma-Aldrich). Half of the culture medium was changed on days 4, 6 and 8.

### **DNA microarray**

Microarray analysis of RNA isolated from iPS-HPCs and UCB-CD34<sup>+</sup> cells was conducted at the University of Iowa DNA core facility using Affymetrix human gene ST

1.0 arrays. Hematopoietic gene expression data analysis was performed using the 'Enhanced Heat Map' function of the R 'gplots' package.

### **Reverse transcription-polymerase chain reaction (RT-PCR)**

Total RNA was isolated using Trizol reagent (GIBCO/BRL) according to the manufacturer's instructions. The SuperScript™ III One-Step RT-PCR system with Platinum Tag DNA Polymerase kit (Invitrogen) was used for RT-PCR. The primer sequences are as follows; HoxA9, 5'-TGCGGGCATTTAAGTCTGTC-3' and 5'-TCTACAGTAGCCCAATGGCG-3'; GATA1, 5'-CTCCCTGTCCCCAATAGTGC-3' and 5'-GTCCTTCGGCTGCTCCTGTG-3'; CD41, 5'-GACTGTGAATGGTCTTCACCTC -3' and 5'-ACACGTTGAACCATGCGTGCGA-3' ; CD45, 5'-TTCAACTTATACCCTTCGTGTC-3' and 5'-CCTGCTTTACTTTGTCCACTTC-3' and  $\beta$ -actin, 5'-GTGGGGCGCCCCAGGCACCA-3' and 5'-CTCCTTAATGTCACGCACGATTTC-3'. Four-step cycling was used: cDNA synthesis (55°C for 30min), denaturation (94°C for 2min), PCR amplification (30 cycles: 94°C for 15sec, 55°C for 30sec, 68°C for 1min) and final extension (68°C for 5min). PCR products were electrophoresed and visualized through ethidium bromide staining.

### **Colony forming unit assay**

To confirm whether human iPS-HPCs differentiate into the hematopoietic lineage, CD34<sup>+</sup> cells were isolated using human CD34 Microbeads (Miltenyi Biotec) and plated onto 35mm dishes with methylcellulose colony-forming assay medium containing SCF, GM-CSF, IL-3, and Epo (R&D systems) at a density of 50,000 cells/ml. After 10-14 days,

CFUs were plated onto slides using a Cytospin and subsequently stained with Giemsa-Wright solution.

### **Flow cytometry**

The harvested cells were washed with PBS and stained with the following antibodies: FITC-HLA-G antibody (MEM-G/9, AbD Serotec), APC-Tra-1-85 (R&D systems). Anti-hCD34 (4H11), PE-HLA-ABC (W6/32), PE-HLA-DR (L243), APC-CD80 (2D10), PE-CD86 (IT2.2), PE-PD-L1 (29E.2A3), APC-PD-L2 (24F.10C12), PE- mouse IgG and FITC-mouse IgG isotype antibodies were all purchased from BioLegend. PE-hCD45 (HI30), FITC-CD235a (GA-R2), FITC-CD43 (1G10), FITC-CD4 (OKT4), and PE-CD8 (HIT8a) antibodies were purchased from BD Pharmingen. After washing the cells with PBS, the cells were analyzed using a LSRII flow cytometer. For analyzing the data, we used FlowJo Software (Becton Dickinson).

### **ELISPOT assay**

To measure secretion of IFN- $\gamma$  or IL-2 by CTLs upon stimulation with iPS-HPCs, ELISPOT assays were performed. Briefly, 96-well multiscreen filter plates (Millipore) were coated with IFN- $\gamma$  or IL-2 capture antibody (1:200) and incubated at 4°C overnight. The next day, plates were washed and blocked for 2h with complete RPMI-1640 medium. iPS-HPCs were purified on differentiation day 9 by MACS separation using hCD34 Microbeads (Miltenyi Biotec). Afterwards, 50,000 CTLs were plated with 5,000  $\gamma$ -irradiated iPS-HPCs stimulator cells into each well and cocultured overnight with or without treatment of anti-CD28 antibody (5 $\mu$ g/ml). IFN- $\gamma$  or IL-2 production was

subsequently determined through the ELISPOT assay (BD Biosciences) according to the manufacturer's instructions. Developed plates were dried overnight and analyzed using ImmunoSpot software. We used M28e cells (non-HLA A2) as a negative control and immortalized B-cells (HLA-A2) as a positive control for these assays. For the PD-L1 blocking ELISPOT assay, iPS-HPCs were cocultured with CTLs (1:10 ratio) for 3 days with PD-L1 blocking antibody (eBioscience, 10 $\mu$ g/ml) or isotype control. CTLs were then harvested and plated with immortalized B-cells as stimulator cells.

**Table S1. DNA fingerprinting analysis confirmed that human iPS cells were derived from their parental fibroblast cell line and were not contaminated with other human ES cells.**

DNA STR (Short Tandem Repeats) profiles of human parental fibroblasts passaged 10 times and iPS cells passaged 14 times. Both profiles are identical.

| <b>Parental fibroblasts DNA STR profile</b> |      |    |         |    |    |
|---------------------------------------------|------|----|---------|----|----|
| Amelogenin                                  | X    | Y  | D18S51  | 15 | 21 |
| Vwa                                         | 15   |    | Penta E | 12 | 16 |
| D8S1179                                     | 13   |    | D5S818  | 11 | 12 |
| TPOX                                        | 8    |    | D13S317 | 11 | 14 |
| FGA                                         | 2    | 23 | D7S820  | 10 | 11 |
| D3S1358                                     | 15   | 17 | D16S539 | 9  | 11 |
| THO1                                        | 8    |    | CSF1PO  | 11 | 11 |
| D21S11                                      | 31.2 |    | Penta D | 12 |    |

  

| <b>iPS cells DNA STR profile</b> |      |    |         |    |    |
|----------------------------------|------|----|---------|----|----|
| Amelogenin                       | X    | Y  | D18S51  | 15 | 21 |
| Vwa                              | 15   |    | Penta E | 12 | 16 |
| D8S1179                          | 13   |    | D5S818  | 11 | 12 |
| TPOX                             | 8    |    | D13S317 | 11 | 14 |
| FGA                              | 2    | 23 | D7S820  | 10 | 11 |
| D3S1358                          | 15   | 17 | D16S539 | 9  | 11 |
| THO1                             | 8    |    | CSF1PO  | 11 | 11 |
| D21S11                           | 31.2 |    | Penta D | 12 |    |

**Table S2. List of hematopoietic cell related genes analyzed in the DNA array.**

| <b>GeneBank ID</b> | <b>Symbol</b> | <b>Description</b>                                          |
|--------------------|---------------|-------------------------------------------------------------|
| NM_001101          | ACTB          | Actin, beta                                                 |
| NM_001146          | ANGPT1        | Angiopoietin 1                                              |
| NM_000038          | APC           | Adenomatous polyposis coli                                  |
| NM_004674          | ASH2L         | Ash2 (absent, small, or homeotic)-like (Drosophila)         |
| NM_004048          | B2M           | Beta-2-microglobulin                                        |
| NM_013314          | BLNK          | B-cell linker                                               |
| NM_001755          | CBFB          | Core-binding factor, beta subunit                           |
| NM_001295          | CCR1          | Chemokine (C-C motif) receptor 1                            |
| NM_000591          | CD14          | CD14 molecule                                               |
| NM_006016          | CD164         | CD164 molecule, sialomucin                                  |
| NM_001766          | CD1D          | CD1d molecule                                               |
| NM_001767          | CD2           | CD2 molecule                                                |
| NM_001242          | CD27          | CD27 molecule                                               |
| NM_001773          | CD34          | CD34 molecule                                               |
| NM_000732          | CD3D          | CD3d molecule, delta (CD3-TCR complex)                      |
| NM_000073          | CD3G          | CD3g molecule, gamma (CD3-TCR complex)                      |
| NM_000616          | CD4           | CD4 molecule                                                |
| NM_000610          | CD44          | CD44 molecule (Indian blood group)                          |
| NM_005191          | CD80          | CD80 molecule                                               |
| NM_006889          | CD86          | CD86 molecule                                               |
| NM_001768          | CD8A          | CD8a molecule                                               |
| NM_001805          | CEBPE         | CCAAT/enhancer binding protein (C/EBP), epsilon             |
| NM_001806          | CEBPG         | CCAAT/enhancer binding protein (C/EBP), gamma               |
| NM_015892          | CHST15        | Carbohydrate sulfotransferase 15                            |
| NM_000757          | CSF1          | Colony stimulating factor 1 (macrophage)                    |
| NM_000758          | CSF2          | Colony stimulating factor 2 (granulocyte-macrophage)        |
| NM_005618          | DLL1          | Delta-like 1 (Drosophila)                                   |
| NM_005238          | ETS1          | V-ets erythroblastosis virus E26 oncogene homolog 1 (avian) |
| NM_001987          | ETV6          | Ets variant 6                                               |
| NM_001459          | FLT3LG        | Fms-related tyrosine kinase 3 ligand                        |
| NM_032664          | FUT10         | Fucosyltransferase 10 (alpha (1,3) fucosyltransferase)      |
| NM_003505          | FZD1          | Frizzled family receptor 1                                  |
| NM_002046          | GAPDH         | Glyceraldehyde-3-phosphate dehydrogenase                    |
| NM_002049          | GATA1         | GATA binding protein 1 (globin transcription factor 1)      |
| NM_032638          | GATA2         | GATA binding protein 2                                      |
| NM_006037          | HDAC4         | Histone deacetylase 4                                       |
| NM_005474          | HDAC5         | Histone deacetylase 5                                       |
| NM_001098416       | HDAC7         | Histone deacetylase 7                                       |
| NM_178425          | HDAC9         | Histone deacetylase 9                                       |
| NM_016185          | hN1           | Notch 1                                                     |
| NM_000194          | HPRT1         | Hypoxanthine phosphoribosyltransferase 1                    |
| NM_000575          | IL1A          | Interleukin 1, alpha                                        |
| NM_002184          | IL6ST         | Interleukin 6 signal transducer                             |

| GeneBank ID | Symbol  | Description                                                |
|-------------|---------|------------------------------------------------------------|
| NM_000572   | IL10    | Interleukin 10                                             |
| NM_000641   | IL11    | Interleukin 11                                             |
| NM_002187   | IL12B   | Interleukin 12B                                            |
| NM_018724   | IL20    | Interleukin 20                                             |
| NM_022789   | IL25    | Interleukin 25                                             |
| NM_139017   | IL31RA  | Interleukin 31 receptor A                                  |
| NM_002191   | INHBA   | Inhibin, alpha                                             |
| NM_002192   | INHBA   | Inhibin, beta A                                            |
| NM_000214   | JAG1    | Jagged 1                                                   |
| NM_002226   | JAG2    | Jagged 2                                                   |
| NM_002253   | KDR     | Kinase insert domain receptor (type III)                   |
| NM_000222   | KIT     | V-kit Hardy-Zuckerman 4 feline sarcoma oncogene homolog    |
| NM_003994   | KITLG   | KIT ligand                                                 |
| NM_016269   | LEF1    | Lymphoid enhancer-binding factor 1                         |
| NM_005574   | LMO2    | LIM domain only 2 (rhombotin-like 1)                       |
| NM_006152   | LRMP    | Lymphoid-restricted membrane protein                       |
| NM_002371   | MAL     | Mal, T-cell differentiation protein                        |
| NM_007181   | MAP4K1  | Mitogen-activated protein kinase kinase kinase kinase 1    |
| NM_004994   | MMP9    | Matrix metalloproteinase 9                                 |
| NM_014071   | NCOA6   | Nuclear receptor coactivator 6                             |
| NM_000625   | NOS2    | Nitric oxide synthase 2, inducible                         |
| NM_017617   | NOTCH1  | Notch 1                                                    |
| NM_024408   | NOTCH2  | Notch 2                                                    |
| NM_004557   | NOTCH4  | Notch 4                                                    |
| NM_016734   | PAX5    | Paired box 5                                               |
| NM_000442   | PECAM1  | Platelet/endothelial cell adhesion molecule                |
| NM_002619   | PF4     | Platelet factor 4                                          |
| NM_002838   | PTPRC   | Protein tyrosine phosphatase, receptor type, C             |
| NM_005349   | RBPJ    | Recombination signal binding protein for Ig kappa J region |
| NM_001754   | RUNX1   | Runt-related transcription factor 1                        |
| NM_022754   | SFXN1   | Sideroflexin 1                                             |
| NM_144949   | SOCS5   | Suppressor of cytokine signaling 5                         |
| NM_000582   | SPP1    | Secreted phosphoprotein 1                                  |
| NM_007315   | STAT1   | Signal transducer and activator of transcription 1, 91kDa  |
| NM_003150   | STAT3   | Signal transducer and activator of transcription 3         |
| NM_020860   | STIM2   | Stromal interaction molecule 2                             |
| NM_003189   | TAL1    | T-cell acute lymphocytic leukemia 1                        |
| NM_000459   | TEK     | TEK tyrosine kinase, endothelial                           |
| NM_003265   | TLR3    | Toll-like receptor 3                                       |
| NM_138554   | TLR4    | Toll-like receptor 4                                       |
| NM_003701   | TNFSF11 | Tumor necrosis factor (ligand) superfamily, member 11      |
| NM_006778   | TRIM10  | Tripartite motif containing 10                             |
| NM_005428   | VAV1    | Vav 1 guanine nucleotide exchange factor                   |
| NM_003376   | VEGFA   | Vascular endothelial growth factor A                       |
| NM_033131   | WNT3A   | Wingless-type MMTV integration site family, member 3A      |

**Table S3. Highly comparable expression of MHC and B7 family molecules in HPCs derived from distinct iPS cell lines.**

Expression of HLA-ABC, HLA-DR, HLA-E, HLA-G, MIC A/B, CD80, CD86, PDL1 and PDL2 was measured in UCB-CD34<sup>+</sup> cells and in HPCs derived from four different iPS cell lines.

|                | #1 iPS-<br>CD34 <sup>+</sup> | #2 iPS-<br>CD34 <sup>+</sup> | #3 iPS-<br>CD34 <sup>+</sup> | #4 iPS-<br>CD34 <sup>+</sup> | UCB-<br>CD34 <sup>+</sup> |
|----------------|------------------------------|------------------------------|------------------------------|------------------------------|---------------------------|
| HLA-ABC        | 5.1                          | 6.0                          | 8.4                          | 8.6                          | <b>512</b>                |
| HLA-DR         | 2.6                          | 2.7                          | 3.0                          | 3.4                          | <b>13.9</b>               |
| HLA-E          | 3.9                          | 9.4                          | 5.3                          | <b>11.14</b>                 | <b>35.1</b>               |
| <b>HLA-G</b>   | <b>11.4</b>                  | <b>16.7</b>                  | <b>11.2</b>                  | <b>14.6</b>                  | 5.5                       |
| <b>MIC A/B</b> | <b>7.0</b>                   | <b>9.3</b>                   | <b>19.9</b>                  | <b>10.7</b>                  | 5.8                       |
| CD80           | 4.3                          | 6.7                          | 5.3                          | 4.1                          | 4.3                       |
| CD86           | 3.7                          | 3.9                          | 4.3                          | 4.2                          | <b>9.9</b>                |
| <b>PDL1</b>    | <b>16.9</b>                  | <b>12.9</b>                  | <b>28.5</b>                  | <b>25.8</b>                  | <b>17.7</b>               |
| PDL2           | 3.6                          | 3.3                          | 3.8                          | 3.7                          | 4.8                       |

Depicted above are representative values of the MFI. These experiments were repeated 7 times.



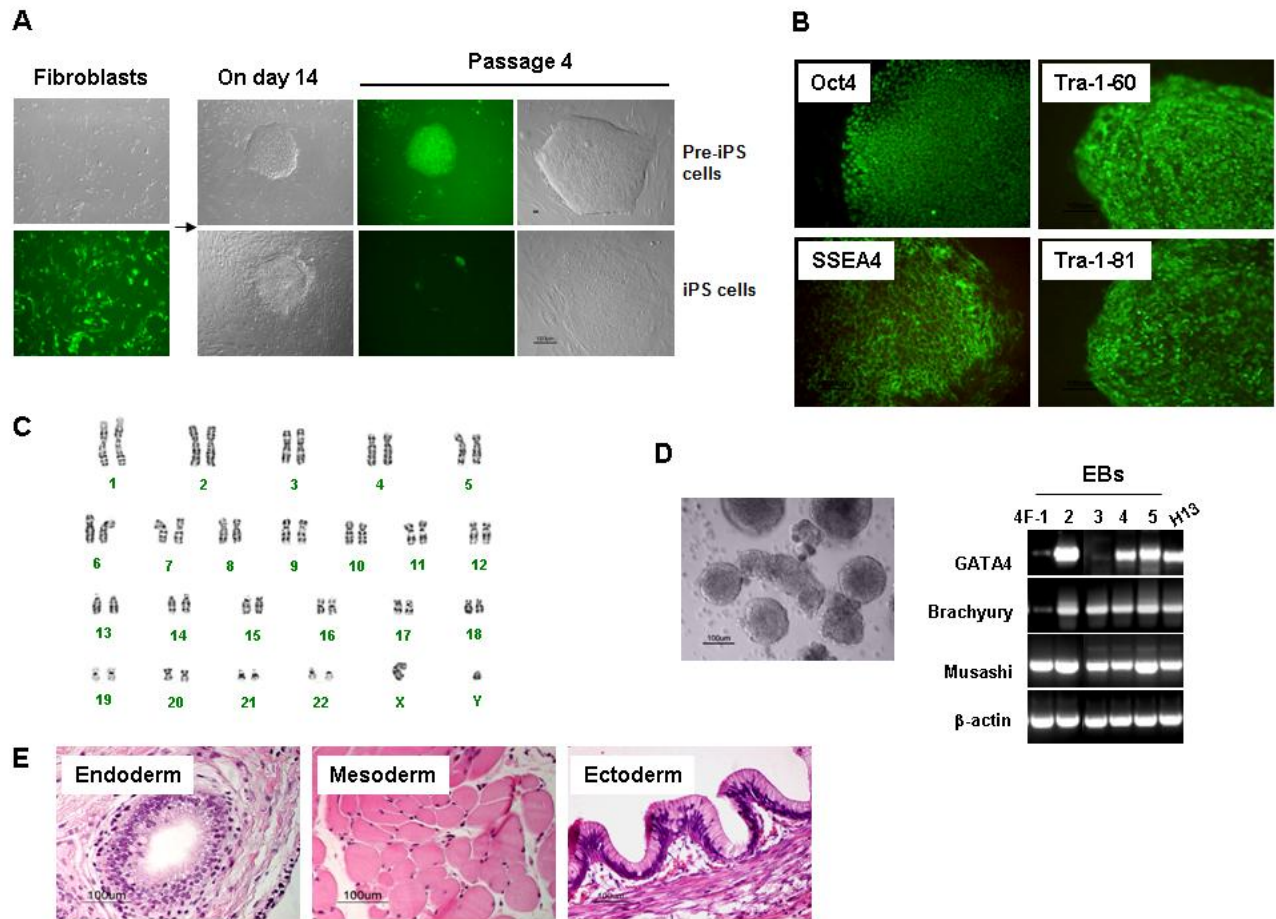

**Figure S1. Human iPS cells reprogrammed from fibroblasts are pluripotent.**

**(A)** After viral transduction, the fibroblasts were GFP-positive. However, as expected, fully reprogrammed human iPS cells silenced GFP expression. The iPS cells form colonies with a compact appearance similar to that of human ES cells. Pre-iPS cells remained GFP expressing.

**(B)** Representative immunofluorescence staining of iPS cells. iPS cells derived from human fibroblasts strongly express ES cell-characteristic markers, Oct4, Tra-1-60, SSEA4 and Tra-1-81.

**(C)** Human iPS cells maintain normal karyotypes. The G-band karyotypes of fully reprogrammed iPS cells showed a normal, diploid, male chromosomal karyotype, consistent with that of the parental fibroblasts.

**(D)** Fully reprogrammed iPS cells successfully form EBs *in vitro*. The left panel shows the morphology of EBs and the right panel shows a typical germ layer specific gene expression pattern by RT-PCR on EBs derived from 5 different iPS cell lines and the human ES cell line H13 used as a positive control.

**(E)** iPS cells form teratomas. iPS cells were infused subcutaneously in NOD-*Scid* *IL2R $\gamma$ <sup>null</sup>* mice. After 10-12 weeks, teratomas formed. Histological sections of the teratomas revealed tissues of all three germ layers (endoderm, mesoderm and ectoderm) as proof of pluripotency.

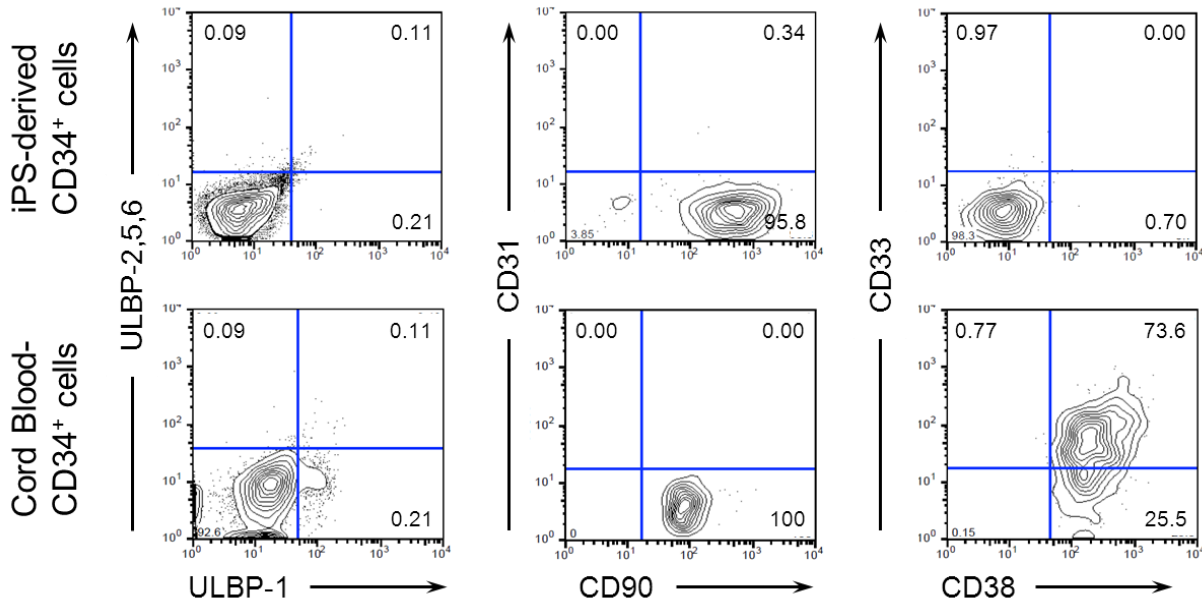

**Figure S2. Hematopoietic subset characterization of iPS-HPCs reveals that they are CD90<sup>+</sup>CD38<sup>-</sup>CD31<sup>-</sup>CD33<sup>-</sup> and do not express NK cell activating ligands.** To further investigate the potential susceptibility of iPS-HPCs to NK cells, we examined the expression of the human NK cell activating ligands ULBP-1 and ULBP-2,5,6, which bind to the NKG2D receptor. iPS-HPCs did not express these ligands, similar to UCB-CD34<sup>+</sup> cells. Additionally, like UCB-CD34<sup>+</sup> cells, iPS-HPCs expressed high levels of the hematopoietic stem cell marker CD90, and were negative for CD31 expression. CD33, which is expressed by lineage committed cells, was not expressed by iPS-HPCs but was found on the majority of UB-CD34<sup>+</sup> cells. Finally, unlike UCB-CD34<sup>+</sup> cells, iPS-HPCs did not express CD38, suggesting their similarity to CD34<sup>+</sup>CD38<sup>-</sup> bone marrow hematopoietic stem cells, which are considered the most pluripotent blast colony-forming hematopoietic stem cells.

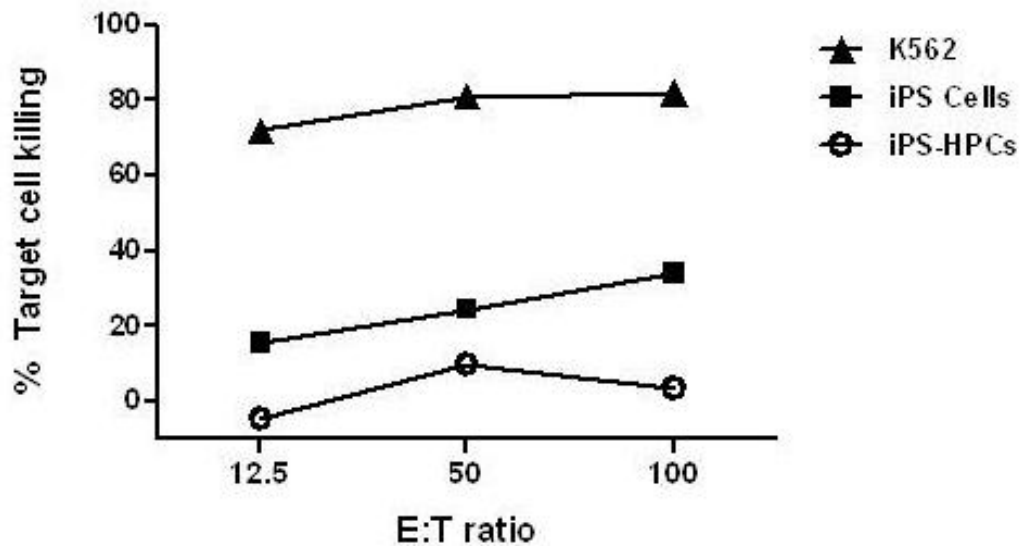

**Figure S3. iPS-HPCs are hardly susceptible to NK cells *in vitro*.** In this standard  $^{51}\text{Cr}$  release assay, NK cells from human PBMCs were plated with iPS cells (■), K562 target cells (▲) or iPS cell-derived  $\text{CD34}^+$  HPCs (⊖) at three different effector-to-target cell ratios. iPS cell-derived  $\text{CD34}^+$  HPCs show very low susceptibility to killing by NK cells at all ratios tested.

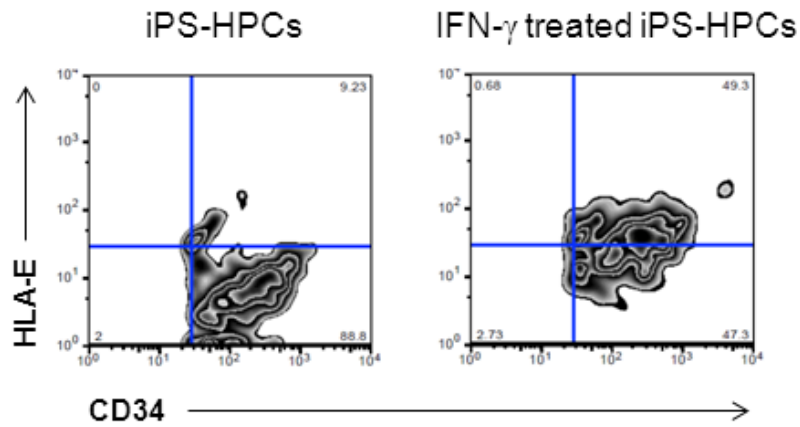

**Figure S4. Expression levels of HLA-E molecules were up-regulated following treatment with IFN- $\gamma$ .** To verify the expression of HLA-E molecules on IFN- $\gamma$  treated iPS-HPCs, human IFN- $\gamma$  (50ng/ml) was treated onto CD34<sup>+</sup> iPS-HPCs for 48h. Subsequently, flow cytometry analysis was performed using anti-HLA-E PE-conjugated antibody. iPS-HPCs upregulate the expression of HLA-E upon IFN- $\gamma$  treatment.

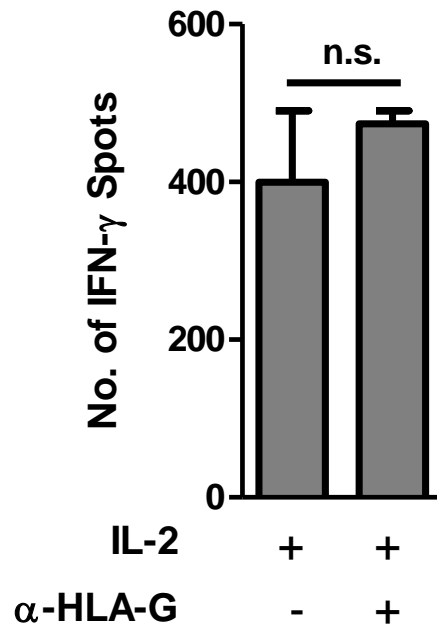

**Figure S5. Blockade of HLA-G on iPS-HPCs does not affect CTL response to allostimulation.** IFN- $\gamma$  stimulated iPS-HPCs were pretreated with anti-HLA-G blocking antibody or isotype antibody and then cocultured with CTLs for 3 days. The CTLs were then plated into an IFN- $\gamma$  ELISPOT plate with irradiated B cells, and then treated with recombinant IL-2. IFN- $\gamma$  production by CTLs cocultured with untreated iPS-HPCs or iPS-HPCs pretreated with anti-HLA-G blocking antibody is not significantly different. These experiments were repeated 3 times (mean  $\pm$  SD).
